# Supplementary material
Source: PubMed Central journal article supplement (PMC4776757)

**Supplementary Information For:** Flexible CDOCKER: Development and application of a pseudo-explicit structure-based docking method within CHARMM

Jessica K. Gagnon, Sean M. Law, Charles L. Brooks III

**Table 1:**

The PDBIDs and CDOCKER results for CCDC/Astex subset. Included are lowest RMSD conformation found and the RMSD for the lowest energy conformation for the two simulated annealing implementations and the MD+Minimization protocols.

*Rigid CDOCKER results*

| PDBID | <i>SA- 1 Grid</i> |               | <i>SA- 2 Grids</i> |               | <i>MD+Minimization</i> |               |
|-------|-------------------|---------------|--------------------|---------------|------------------------|---------------|
|       | Lowest RMSD       | Lowest Energy | Lowest RMSD        | Lowest Energy | Lowest RMSD            | Lowest Energy |
| 1a28  | 0.2               | 0.3           | 0.4                | 0.4           | 0.2                    | 0.2           |
| 1a6w  | 1.8               | 2.2           | 1.5                | 2.9           | 1.8                    | 2.1           |
| 1abe  | 1.2               | 2.9           | 1.7                | 2.6           | 1.1                    | 2.9           |
| 1abf  | 0.9               | 3.2           | 2.2                | 3.4           | 1.2                    | 3.2           |
| 1acj  | 0.6               | 0.7           | 0.3                | 0.6           | 0.4                    | 0.5           |
| 1acl  | 2.3               | 4.2           | 2.3                | 5.5           | 2.5                    | 2.7           |
| 1acm  | 1.1               | 2.0           | 1.5                | 2.3           | 0.9                    | 1.2           |
| 1aco  | 0.9               | 3.7           | 1.7                | 2.9           | 0.8                    | 1.4           |
| 1aec  | 1.4               | 2.5           | 1.4                | 1.4           | 1.6                    | 1.6           |
| 1ai5  | 0.6               | 1.1           | 1.0                | 1.3           | 0.6                    | 0.6           |
| 1aoe  | 1.9               | 2.2           | 1.8                | 1.9           | 1.8                    | 2.0           |
| 1aqw  | 0.8               | 2.5           | 1.6                | 2.7           | 0.7                    | 1.3           |
| 1ase  | 1.6               | 3.1           | 1.7                | 2.9           | 1.1                    | 3.1           |
| 1azm  | 1.6               | 5.8           | 1.7                | 2.0           | 1.6                    | 2.0           |
| 1b59  | 0.4               | 5.3           | 0.5                | 6.9           | 0.5                    | 5.6           |
| 1b9v  | 1.8               | 2.1           | 1.9                | 2.5           | 1.7                    | 2.0           |
| 1baf  | 1.0               | 6.1           | 1.9                | 4.4           | 1.1                    | 2.4           |
| 1bbp  | 1.1               | 8.3           | 1.2                | 2.3           | 1.1                    | 2.7           |
| 1bgo  | 1.8               | 1.8           | 1.6                | 2.1           | 2.0                    | 2.1           |
| 1blh  | 1.8               | 1.8           | 1.4                | 2.5           | 1.7                    | 1.8           |
| 1bmq  | 1.6               | 2.3           | 1.6                | 2.0           | 1.9                    | 1.9           |
| 1byg  | 0.6               | 2.6           | 0.5                | 1.6           | 0.5                    | 1.7           |
| 1c12  | 1.6               | 2.3           | 1.8                | 2.5           | 1.7                    | 2.3           |
| 1c1e  | 0.6               | 4.4           | 0.7                | 0.8           | 0.5                    | 0.6           |
| 1c5c  | 1.7               | 2.3           | 1.4                | 3.4           | 1.5                    | 2.3           |
| 1c5x  | 1.2               | 1.3           | 0.5                | 0.9           | 1.2                    | 1.3           |
| 1c83  | 0.6               | 0.6           | 1.0                | 1.0           | 0.6                    | 0.9           |

|      |     |     |     |     |     |     |
|------|-----|-----|-----|-----|-----|-----|
| lcbs | 0.9 | 1.1 | 0.8 | 1.1 | 1.0 | 1.1 |
| lcbx | 0.7 | 1.1 | 0.9 | 1.3 | 0.6 | 1.1 |
| lcdg | 1.8 | 4.0 | 1.8 | 2.9 | 2.0 | 2.9 |
| lckp | 0.6 | 2.9 | 0.6 | 2.9 | 0.6 | 2.9 |
| lcle | 2.1 | 3.1 | 1.4 | 1.9 | 2.3 | 2.3 |
| lcom | 1.7 | 4.3 | 0.6 | 4.3 | 1.0 | 1.7 |
| lcoy | 0.8 | 0.9 | 0.7 | 1.2 | 0.8 | 0.9 |
| lcqp | 1.1 | 1.1 | 1.0 | 2.0 | 1.1 | 1.2 |
| lcvu | 1.1 | 1.7 | 1.2 | 2.3 | 1.1 | 2.3 |
| lcx2 | 1.5 | 1.8 | 1.5 | 1.8 | 1.5 | 1.7 |
| ld0l | 1.2 | 1.4 | 1.2 | 1.8 | 1.2 | 3.0 |
| ld3h | 1.5 | 7.3 | 0.9 | 1.1 | 1.4 | 7.3 |
| ld4p | 1.1 | 1.6 | 1.3 | 2.2 | 1.1 | 8.5 |
| ldbb | 1.8 | 5.3 | 1.4 | 5.2 | 1.3 | 4.6 |
| ldbj | 0.7 | 0.8 | 0.6 | 0.7 | 0.7 | 0.8 |
| ldd7 | 3.0 | 3.9 | 3.1 | 6.0 | 1.1 | 4.6 |
| ldg5 | 1.5 | 5.8 | 1.5 | 6.0 | 1.5 | 2.5 |
| ldid | 1.2 | 5.5 | 1.9 | 2.6 | 1.2 | 5.4 |
| ldmp | 3.4 | 3.4 | 3.5 | 4.9 | 3.5 | 3.9 |
| ldog | 0.4 | 4.1 | 1.0 | 3.1 | 0.3 | 3.7 |
| ldr1 | 0.5 | 2.5 | 1.0 | 2.4 | 0.6 | 2.4 |
| ldwb | 2.0 | 2.2 | 0.9 | 2.1 | 0.6 | 2.2 |
| ldwc | 0.9 | 1.3 | 2.6 | 5.6 | 1.0 | 1.0 |
| ldwd | 2.3 | 6.1 | 2.5 | 5.7 | 1.2 | 1.3 |
| ldy9 | 1.4 | 1.4 | 1.8 | 3.1 | 1.3 | 1.4 |
| leap | 2.2 | 4.3 | 2.3 | 3.6 | 2.3 | 3.8 |
| lebg | 0.6 | 3.0 | 0.9 | 2.6 | 0.6 | 3.0 |
| leil | 0.6 | 0.6 | 1.9 | 1.9 | 0.6 | 0.6 |
| lejn | 1.8 | 5.5 | 1.7 | 4.1 | 1.6 | 5.7 |
| leoc | 1.5 | 1.7 | 1.3 | 2.5 | 1.5 | 1.5 |
| lepb | 1.1 | 2.8 | 1.1 | 1.8 | 1.1 | 1.2 |
| letr | 0.9 | 0.9 | 0.9 | 0.9 | 1.0 | 1.0 |
| lets | 3.5 | 4.5 | 3.2 | 4.2 | 3.6 | 4.6 |
| lf0r | 2.0 | 4.1 | 1.8 | 3.8 | 2.5 | 3.9 |
| lf0s | 1.4 | 3.9 | 1.8 | 4.2 | 2.4 | 3.9 |
| lfen | 0.6 | 0.8 | 0.6 | 0.6 | 0.5 | 0.6 |
| lfgi | 0.6 | 5.7 | 0.5 | 0.6 | 0.7 | 1.1 |
| lflg | 1.4 | 2.3 | 1.0 | 1.8 | 1.0 | 2.0 |
| lfl3 | 0.6 | 1.2 | 0.7 | 0.7 | 0.7 | 0.8 |
| lflr | 2.3 | 4.5 | 2.3 | 4.5 | 2.3 | 4.5 |
| lfrp | 1.0 | 1.0 | 1.2 | 2.3 | 0.7 | 1.0 |
| lglp | 0.9 | 0.9 | 1.0 | 3.0 | 1.6 | 1.8 |
| lglq | 3.1 | 4.8 | 2.7 | 5.4 | 3.0 | 4.5 |

|      |     |     |     |     |     |     |
|------|-----|-----|-----|-----|-----|-----|
| lhak | 1.9 | 4.0 | 1.5 | 7.8 | 1.8 | 4.3 |
| lhdc | 0.8 | 1.2 | 0.8 | 1.2 | 0.8 | 0.9 |
| lhfc | 2.3 | 3.8 | 2.2 | 3.5 | 1.9 | 3.4 |
| lhiv | 1.2 | 1.7 | 1.8 | 1.9 | 1.9 | 3.1 |
| lhpv | 1.0 | 1.2 | 1.1 | 1.4 | 1.0 | 1.1 |
| lhri | 0.9 | 2.0 | 1.0 | 1.2 | 0.9 | 1.1 |
| lhtf | 1.8 | 1.9 | 1.5 | 7.4 | 1.7 | 3.5 |
| lhyt | 2.4 | 3.2 | 2.4 | 2.9 | 2.5 | 2.8 |
| libg | 0.7 | 0.8 | 0.6 | 1.5 | 0.7 | 0.7 |
| limb | 2.7 | 6.7 | 3.2 | 6.6 | 2.6 | 7.1 |
| livb | 2.0 | 3.5 | 2.4 | 3.3 | 2.0 | 4.5 |
| lkel | 1.1 | 1.4 | 1.4 | 1.8 | 1.2 | 1.4 |
| llah | 0.5 | 1.1 | 1.1 | 2.7 | 0.5 | 1.1 |
| llcp | 0.6 | 1.0 | 0.9 | 1.0 | 0.5 | 0.8 |
| llic | 1.3 | 3.9 | 1.4 | 2.2 | 1.5 | 2.7 |
| llpm | 0.9 | 4.8 | 0.5 | 0.5 | 0.6 | 0.6 |
| llst | 1.1 | 1.2 | 1.1 | 2.2 | 1.0 | 2.0 |
| lmcq | 0.7 | 1.1 | 0.7 | 1.9 | 0.7 | 1.1 |
| lmdr | 1.3 | 2.5 | 1.5 | 2.6 | 1.3 | 2.5 |
| lmlc | 1.3 | 1.5 | 1.6 | 2.6 | 1.4 | 1.5 |
| lmsg | 1.2 | 4.8 | 1.0 | 3.4 | 1.2 | 4.8 |
| lmrk | 1.4 | 1.7 | 1.4 | 1.5 | 1.4 | 1.5 |
| lmts | 0.9 | 2.1 | 1.1 | 2.1 | 1.1 | 2.0 |
| lmup | 1.2 | 1.4 | 1.1 | 4.3 | 1.1 | 1.3 |
| lncp | 1.1 | 3.5 | 1.1 | 2.6 | 1.4 | 3.5 |
| lngp | 1.8 | 4.1 | 0.9 | 4.4 | 1.2 | 4.0 |
| lokl | 1.7 | 2.4 | 1.0 | 3.0 | 1.3 | 2.0 |
| lpdz | 1.7 | 2.2 | 1.7 | 4.4 | 1.4 | 2.2 |
| lphd | 1.8 | 3.0 | 2.1 | 7.0 | 1.6 | 3.6 |
| lphg | 2.1 | 4.9 | 1.3 | 6.4 | 1.9 | 4.9 |
| lpoc | 1.0 | 1.0 | 1.5 | 1.5 | 1.0 | 1.0 |
| lppc | 1.6 | 3.1 | 2.3 | 7.5 | 1.2 | 1.2 |
| lpph | 4.9 | 6.2 | 4.4 | 6.1 | 4.9 | 5.6 |
| lptv | 4.3 | 7.3 | 3.9 | 7.2 | 4.3 | 8.6 |
| lqcf | 1.3 | 1.4 | 0.8 | 0.8 | 1.3 | 1.4 |
| lqpe | 1.7 | 2.2 | 0.7 | 0.7 | 1.4 | 1.5 |
| lqpq | 0.7 | 3.0 | 1.1 | 2.4 | 0.7 | 3.0 |
| lrnt | 0.6 | 0.6 | 0.8 | 1.1 | 0.5 | 0.5 |
| lrob | 0.9 | 1.1 | 0.7 | 3.3 | 0.9 | 1.1 |
| lrt2 | 0.6 | 0.6 | 0.6 | 0.7 | 0.5 | 0.6 |
| lslt | 2.2 | 3.0 | 2.1 | 2.8 | 1.4 | 4.8 |
| lsnc | 1.2 | 5.3 | 2.6 | 5.3 | 0.7 | 1.4 |
| lsrj | 0.9 | 3.6 | 0.9 | 1.2 | 0.9 | 2.8 |

|      |     |     |     |     |     |     |
|------|-----|-----|-----|-----|-----|-----|
| 1tdb | 1.6 | 1.8 | 1.4 | 3.5 | 1.4 | 2.1 |
| 1tmn | 1.5 | 1.8 | 2.3 | 2.8 | 1.7 | 2.4 |
| 1tng | 0.4 | 0.4 | 4.4 | 4.4 | 0.3 | 0.4 |
| 1tnh | 1.4 | 1.5 | 1.4 | 1.5 | 1.4 | 1.6 |
| 1tni | 1.3 | 3.0 | 1.5 | 2.1 | 1.6 | 1.6 |
| 1tpp | 5.7 | 7.1 | 4.8 | 6.5 | 5.7 | 5.9 |
| 1tyl | 0.8 | 0.8 | 0.6 | 2.1 | 0.9 | 0.9 |
| 1ukz | 0.6 | 6.3 | 0.8 | 4.5 | 0.6 | 0.9 |
| 1ulb | 0.9 | 0.9 | 0.6 | 3.5 | 0.7 | 0.9 |
| 1uvs | 1.8 | 2.2 | 1.7 | 3.9 | 1.5 | 1.7 |
| 1uvt | 3.2 | 3.8 | 3.3 | 3.4 | 3.1 | 3.9 |
| 1vgc | 1.3 | 2.0 | 1.3 | 5.3 | 1.3 | 5.3 |
| 1xid | 1.3 | 2.1 | 1.2 | 2.6 | 1.2 | 1.8 |
| 1xie | 1.6 | 1.9 | 3.9 | 6.5 | 1.5 | 1.9 |
| 1ydr | 0.9 | 4.0 | 0.8 | 3.5 | 0.9 | 0.9 |
| 1yee | 0.9 | 1.0 | 1.1 | 3.2 | 0.9 | 1.1 |
| 25c8 | 1.8 | 2.6 | 1.6 | 1.9 | 1.7 | 2.0 |
| 2aad | 0.8 | 0.9 | 0.5 | 1.0 | 0.8 | 0.8 |
| 2ada | 0.8 | 1.1 | 0.7 | 0.8 | 0.7 | 1.0 |
| 2cht | 1.1 | 3.9 | 1.3 | 4.1 | 1.0 | 3.4 |
| 2cmd | 1.1 | 1.5 | 1.6 | 3.4 | 1.2 | 1.8 |
| 2cpp | 0.3 | 2.7 | 1.5 | 2.8 | 0.3 | 2.6 |
| 2ctc | 2.1 | 2.5 | 2.1 | 2.7 | 1.1 | 1.6 |
| 2fox | 1.4 | 1.4 | 1.1 | 1.3 | 1.2 | 1.6 |
| 2gbp | 0.3 | 0.7 | 0.7 | 3.5 | 0.3 | 0.7 |
| 2h4n | 2.0 | 5.6 | 1.7 | 5.8 | 1.4 | 5.6 |
| 2ifb | 1.0 | 1.3 | 0.9 | 1.6 | 1.0 | 1.5 |
| 2mcp | 1.0 | 3.0 | 4.5 | 4.6 | 0.9 | 1.0 |
| 2pk4 | 1.2 | 2.3 | 1.0 | 2.8 | 1.1 | 2.2 |
| 2r07 | 0.7 | 0.7 | 0.7 | 0.7 | 0.7 | 0.7 |
| 2yhx | 0.8 | 2.8 | 1.6 | 5.4 | 1.0 | 1.4 |
| 2ypi | 1.1 | 1.5 | 1.1 | 1.3 | 0.7 | 1.4 |
| 3ert | 0.6 | 1.1 | 1.1 | 1.5 | 0.7 | 1.1 |
| 3gpb | 1.3 | 5.5 | 0.8 | 2.3 | 1.2 | 5.5 |
| 3hvt | 0.9 | 0.9 | 0.8 | 0.8 | 0.9 | 0.9 |
| 4aah | 0.7 | 1.0 | 1.2 | 5.9 | 0.6 | 5.8 |
| 4cox | 0.6 | 0.7 | 0.4 | 0.7 | 0.6 | 0.7 |
| 4cts | 1.8 | 2.1 | 1.7 | 2.1 | 1.3 | 2.2 |
| 4dfr | 2.9 | 4.7 | 1.7 | 5.6 | 2.3 | 3.8 |
| 4est | 2.3 | 2.9 | 2.2 | 3.8 | 2.2 | 3.4 |
| 4fbp | 0.6 | 5.7 | 1.7 | 2.2 | 0.4 | 1.7 |
| 4lbd | 1.0 | 1.0 | 1.0 | 1.2 | 1.0 | 1.0 |
| 4phv | 3.2 | 4.8 | 2.9 | 5.4 | 3.2 | 5.0 |

|                 |     |     |     |     |     |     |
|-----------------|-----|-----|-----|-----|-----|-----|
| 5abp            | 0.8 | 0.8 | 0.8 | 1.4 | 0.8 | 0.8 |
| 5cpp            | 2.0 | 3.0 | 1.9 | 2.2 | 2.0 | 3.0 |
| 6rnt            | 1.8 | 2.4 | 3.0 | 4.0 | 1.3 | 4.1 |
| 6rsa            | 0.8 | 1.1 | 0.9 | 2.1 | 0.8 | 0.8 |
| 7tim            | 0.9 | 1.6 | 1.3 | 1.8 | 0.8 | 1.6 |
| <b>Averages</b> | 1.4 | 2.7 | 1.5 | 2.9 | 1.3 | 2.4 |

*Flexible CDOCKER results*

| PDBID | <i>SA- 1 Grid</i> |                  | <i>SA- 2 Grids</i> |                  | <i>MD+Minimization</i> |                  |
|-------|-------------------|------------------|--------------------|------------------|------------------------|------------------|
|       | Lowest<br>RMSD    | Lowest<br>Energy | Lowest<br>RMSD     | Lowest<br>Energy | Lowest<br>RMSD         | Lowest<br>Energy |
| 1a28  | 0.2               | 0.2              | 0.2                | 0.3              | 0.2                    | 0.3              |
| 1a6w  | 1.8               | 3.0              | 1.8                | 2.8              | 1.7                    | 2.2              |
| 1abe  | 1.1               | 2.9              | 2.3                | 2.9              | 1.3                    | 2.8              |
| 1abf  | 0.8               | 3.0              | 3.3                | 10.6             | 1.1                    | 3.0              |
| 1acj  | 0.4               | 0.7              | 0.6                | 1.2              | 0.3                    | 0.4              |
| 1acl  | 2.1               | 4.3              | 2.1                | 4.2              | 2.1                    | 3.3              |
| 1acm  | 1.4               | 2.1              | 3.3                | 10.0             | 0.4                    | 2.4              |
| 1aco  | 0.4               | 2.9              | 6.2                | 7.2              | 0.6                    | 1.1              |
| 1aec  | 1.7               | 3.2              | 4.5                | 6.9              | 1.5                    | 1.7              |
| 1ai5  | 0.5               | 1.0              | 0.6                | 8.0              | 0.6                    | 0.9              |
| 1aoe  | 0.9               | 1.7              | 2.6                | 8.0              | 1.7                    | 1.8              |
| 1aqw  | 1.1               | 2.5              | 1.3                | 6.5              | 0.7                    | 2.0              |
| 1ase  | 2.4               | 4.9              | 3.1                | 4.7              | 1.4                    | 2.7              |
| 1azm  | 1.6               | 2.2              | 2.5                | 4.4              | 1.5                    | 2.0              |
| 1b59  | 0.4               | 2.7              | 2.9                | 4.0              | 0.4                    | 2.2              |
| 1b9v  | 1.8               | 1.9              | 2.6                | 8.5              | 1.6                    | 1.9              |
| 1baf  | 2.3               | 2.5              | 3.9                | 7.3              | 3.3                    | 3.9              |
| 1bbp  | 1.3               | 8.1              | 2.2                | 3.9              | 1.4                    | 1.8              |
| 1bgo  | 1.9               | 2.1              | 2.4                | 3.8              | 1.5                    | 2.2              |
| 1blh  | 1.9               | 1.9              | 3.8                | 4.8              | 1.8                    | 2.0              |
| 1bmq  | 2.0               | 2.3              | 5.0                | 5.0              | 1.6                    | 1.9              |
| 1byg  | 0.4               | 1.8              | 0.4                | 0.9              | 0.3                    | 0.3              |
| 1c12  | 1.5               | 2.3              | 1.3                | 2.8              | 1.3                    | 2.3              |
| 1c1e  | 0.3               | 0.3              | 0.4                | 0.4              | 0.3                    | 0.4              |
| 1c5c  | 1.6               | 4.7              | 2.6                | 5.2              | 1.4                    | 3.9              |
| 1c5x  | 0.9               | 0.9              | 0.9                | 0.9              | 0.9                    | 0.9              |
| 1c83  | 0.6               | 1.0              | 5.5                | 11.1             | 0.8                    | 1.0              |
| 1cbs  | 0.8               | 1.1              | 1.0                | 3.5              | 1.1                    | 1.4              |
| 1cbx  | 0.6               | 1.1              | 3.7                | 5.6              | 0.7                    | 1.3              |
| 1cdg  | 2.0               | 2.0              | 2.0                | 2.5              | 2.0                    | 2.6              |

|      |     |     |     |     |     |     |
|------|-----|-----|-----|-----|-----|-----|
| lckp | 0.9 | 1.2 | 3.2 | 5.2 | 0.5 | 1.0 |
| lcle | 3.6 | 5.1 | 4.2 | 4.7 | 3.0 | 3.1 |
| lcom | 1.6 | 3.9 | 4.8 | 8.3 | 0.9 | 1.9 |
| lcoy | 0.7 | 0.8 | 0.5 | 0.9 | 0.6 | 0.8 |
| lcqp | 0.7 | 1.0 | 1.1 | 1.6 | 1.0 | 1.5 |
| lcvu | 0.9 | 1.1 | 1.2 | 1.7 | 1.3 | 1.4 |
| lcx2 | 1.5 | 1.7 | 1.6 | 1.7 | 1.5 | 1.6 |
| ld0l | 1.3 | 1.7 | 3.3 | 5.4 | 1.1 | 1.5 |
| ld3h | 1.5 | 1.9 | 1.3 | 7.6 | 1.5 | 1.9 |
| ld4p | 1.0 | 1.3 | 1.9 | 7.9 | 1.0 | 1.4 |
| ldbb | 0.7 | 4.4 | 3.0 | 5.0 | 0.8 | 3.5 |
| ldbj | 0.4 | 0.8 | 0.9 | 1.3 | 0.4 | 0.5 |
| ldd7 | 2.3 | 5.1 | 3.8 | 6.3 | 1.8 | 4.0 |
| ldg5 | 1.4 | 2.9 | 2.5 | 4.6 | 0.7 | 0.9 |
| ldid | 1.0 | 5.7 | 4.9 | 7.7 | 1.0 | 5.7 |
| ldmp | 3.5 | 5.0 | 3.4 | 4.5 | 3.5 | 4.2 |
| ldog | 1.6 | 2.2 | 1.9 | 8.4 | 0.2 | 0.3 |
| ldr1 | 0.4 | 2.4 | 3.6 | 3.6 | 0.3 | 2.3 |
| ldwb | 0.5 | 0.5 | 0.4 | 2.0 | 0.4 | 0.4 |
| ldwc | 0.9 | 0.9 | 3.3 | 5.1 | 0.9 | 0.9 |
| ldwd | 2.2 | 3.7 | 3.6 | 7.5 | 1.3 | 1.9 |
| ldy9 | 1.6 | 1.6 | 3.5 | 5.6 | 1.4 | 1.5 |
| leap | 2.0 | 4.1 | 2.5 | 3.7 | 2.3 | 4.1 |
| lebg | 0.5 | 2.0 | 8.7 | 9.9 | 0.4 | 1.6 |
| leil | 0.4 | 0.5 | 8.2 | 9.7 | 0.5 | 0.5 |
| lejn | 1.5 | 7.0 | 1.2 | 4.7 | 1.7 | 3.9 |
| leoc | 2.0 | 4.5 | 5.4 | 7.2 | 1.8 | 2.4 |
| lepb | 1.0 | 1.3 | 0.9 | 1.2 | 1.0 | 1.2 |
| letr | 0.7 | 0.7 | 6.1 | 6.8 | 0.8 | 0.9 |
| lets | 3.7 | 3.7 | 3.7 | 4.1 | 4.0 | 4.2 |
| lf0r | 2.2 | 4.6 | 2.2 | 4.0 | 2.4 | 3.3 |
| lf0s | 2.5 | 4.9 | 1.6 | 3.4 | 1.9 | 5.0 |
| lfen | 0.6 | 0.7 | 0.5 | 0.6 | 0.6 | 0.7 |
| lfgi | 0.4 | 0.6 | 2.9 | 4.7 | 0.5 | 0.5 |
| lfgk | 1.5 | 1.6 | 1.7 | 2.4 | 1.3 | 1.3 |
| lfl3 | 0.5 | 1.0 | 0.8 | 1.4 | 0.8 | 1.2 |
| lflr | 2.2 | 4.5 | 2.8 | 4.9 | 2.2 | 4.5 |
| lfrp | 0.4 | 1.1 | 5.8 | 9.8 | 0.4 | 0.5 |
| lglp | 1.0 | 5.0 | 5.3 | 5.8 | 1.1 | 1.4 |
| lglq | 2.5 | 6.7 | 5.1 | 6.8 | 2.0 | 2.1 |
| lhak | 2.2 | 3.8 | 2.3 | 6.2 | 1.9 | 3.7 |
| lhdc | 0.9 | 1.2 | 0.9 | 1.3 | 0.8 | 1.0 |
| lhfc | 2.6 | 3.4 | 2.4 | 4.7 | 2.2 | 2.4 |

|       |     |     |     |      |     |     |
|-------|-----|-----|-----|------|-----|-----|
| lhiv  | 2.2 | 3.5 | 1.3 | 1.3  | 2.5 | 2.5 |
| lhpv  | 1.0 | 1.4 | 1.1 | 1.2  | 1.3 | 1.3 |
| lhri  | 0.9 | 2.5 | 0.8 | 3.8  | 0.7 | 0.9 |
| lhtf  | 1.9 | 3.9 | 1.8 | 3.0  | 1.5 | 2.2 |
| lhyt  | 2.5 | 2.8 | 2.4 | 2.9  | 2.4 | 3.2 |
| libg  | 0.8 | 1.8 | 1.8 | 2.2  | 0.7 | 0.7 |
| limb  | 2.8 | 6.5 | 5.4 | 11.8 | 2.6 | 4.2 |
| livb  | 1.7 | 3.8 | 2.4 | 4.3  | 1.8 | 1.8 |
| lkel  | 1.0 | 1.3 | 1.8 | 1.8  | 1.4 | 1.4 |
| llah  | 0.4 | 1.1 | 1.5 | 2.5  | 0.5 | 1.1 |
| llcp  | 0.8 | 0.9 | 1.2 | 8.2  | 0.6 | 0.9 |
| llic  | 1.7 | 2.7 | 2.7 | 3.9  | 1.2 | 2.6 |
| llpm  | 1.9 | 2.4 | 1.6 | 4.2  | 1.2 | 2.3 |
| llst  | 1.1 | 1.4 | 0.9 | 1.8  | 1.0 | 1.6 |
| lmcq  | 0.7 | 1.7 | 0.7 | 1.2  | 0.7 | 2.5 |
| lmdr  | 1.1 | 3.0 | 2.4 | 4.1  | 1.2 | 2.0 |
| lmlD  | 1.5 | 1.7 | 3.6 | 4.1  | 1.4 | 1.8 |
| lmrg  | 1.2 | 2.5 | 5.3 | 10.5 | 1.1 | 1.3 |
| lmrk  | 0.8 | 1.1 | 5.7 | 10.5 | 0.8 | 1.2 |
| lmts  | 0.9 | 1.3 | 1.4 | 2.2  | 1.1 | 1.2 |
| lmup  | 0.9 | 1.4 | 1.2 | 1.5  | 0.9 | 1.2 |
| lneo  | 1.3 | 2.2 | 3.6 | 3.8  | 0.9 | 2.1 |
| lngp  | 1.1 | 3.6 | 2.9 | 5.0  | 1.0 | 3.7 |
| lokI  | 0.5 | 2.2 | 3.4 | 5.5  | 1.5 | 2.2 |
| lpdz  | 1.4 | 3.7 | 2.7 | 3.2  | 1.4 | 2.0 |
| lphd  | 1.6 | 4.2 | 1.5 | 6.7  | 1.5 | 2.6 |
| lphg  | 2.5 | 4.2 | 2.8 | 6.4  | 2.4 | 2.7 |
| lpoc  | 0.8 | 1.0 | 1.3 | 2.1  | 0.9 | 0.9 |
| lppc  | 2.0 | 3.3 | 3.5 | 7.2  | 1.2 | 2.0 |
| lpph  | 4.9 | 5.6 | 5.2 | 6.1  | 4.8 | 5.7 |
| lptv  | 4.4 | 8.0 | 4.1 | 9.8  | 4.1 | 8.5 |
| lqcf  | 0.8 | 1.3 | 3.8 | 9.5  | 1.3 | 1.3 |
| lqpe  | 0.7 | 1.2 | 1.7 | 1.7  | 1.1 | 1.3 |
| lqqq  | 1.2 | 1.5 | 2.6 | 12.1 | 0.8 | 1.2 |
| lrnt  | 0.8 | 1.3 | 3.9 | 7.0  | 0.8 | 0.8 |
| lrob  | 0.9 | 0.9 | 4.6 | 8.8  | 0.7 | 1.1 |
| lrt2  | 0.6 | 0.7 | 0.5 | 0.6  | 0.5 | 1.1 |
| lslt  | 1.3 | 4.7 | 2.1 | 6.3  | 1.0 | 1.8 |
| lsnc  | 0.9 | 1.9 | 4.7 | 5.8  | 0.8 | 4.6 |
| lstrj | 0.8 | 1.9 | 3.4 | 3.4  | 0.7 | 1.0 |
| ltdb  | 1.6 | 3.4 | 3.8 | 8.7  | 1.1 | 1.6 |
| ltmn  | 1.8 | 2.1 | 2.4 | 2.7  | 1.4 | 3.0 |
| ltng  | 0.1 | 0.1 | 3.5 | 3.7  | 0.1 | 0.2 |

|      |     |     |     |      |     |     |
|------|-----|-----|-----|------|-----|-----|
| 1tnh | 1.4 | 1.8 | 1.3 | 1.6  | 1.4 | 1.7 |
| 1tni | 1.4 | 2.8 | 1.4 | 2.0  | 1.6 | 2.6 |
| 1tpp | 5.6 | 6.0 | 6.3 | 11.2 | 5.5 | 5.8 |
| 1tyl | 0.9 | 1.5 | 1.5 | 3.0  | 0.7 | 0.8 |
| 1ukz | 0.5 | 2.4 | 5.1 | 7.7  | 0.5 | 0.7 |
| 1ulb | 0.5 | 1.3 | 2.7 | 7.8  | 0.4 | 1.3 |
| 1uvs | 1.5 | 1.9 | 3.8 | 6.0  | 1.7 | 2.4 |
| 1uvt | 2.9 | 3.2 | 3.1 | 3.5  | 3.5 | 4.7 |
| 1vgc | 1.1 | 2.0 | 1.1 | 1.5  | 1.1 | 1.5 |
| 1xid | 1.4 | 2.3 | 1.3 | 1.6  | 1.3 | 1.4 |
| 1xie | 1.9 | 4.3 | 8.2 | 12.2 | 1.1 | 2.2 |
| 1ydr | 0.5 | 0.6 | 1.0 | 1.6  | 0.5 | 0.6 |
| 1yee | 1.2 | 1.2 | 2.3 | 3.7  | 1.0 | 1.2 |
| 25c8 | 1.7 | 2.1 | 2.4 | 4.3  | 1.5 | 1.7 |
| 2aad | 0.6 | 0.8 | 3.8 | 6.9  | 0.6 | 0.8 |
| 2ada | 0.4 | 0.5 | 2.9 | 11.1 | 0.5 | 0.5 |
| 2cht | 1.4 | 3.1 | 2.4 | 8.7  | 1.1 | 1.6 |
| 2cmd | 1.3 | 1.8 | 2.8 | 4.1  | 1.3 | 2.1 |
| 2cpp | 0.5 | 2.1 | 1.9 | 5.5  | 0.2 | 0.3 |
| 2ctc | 2.3 | 2.6 | 2.2 | 2.7  | 2.3 | 2.8 |
| 2fox | 1.1 | 1.5 | 6.1 | 7.9  | 0.6 | 1.5 |
| 2gbp | 0.5 | 0.7 | 2.1 | 14.6 | 0.3 | 0.4 |
| 2h4n | 1.6 | 1.7 | 1.8 | 3.9  | 1.6 | 1.8 |
| 2ifb | 1.0 | 1.7 | 1.8 | 2.6  | 1.0 | 1.8 |
| 2mcp | 0.9 | 1.6 | 4.2 | 6.5  | 0.8 | 1.2 |
| 2pk4 | 1.1 | 2.1 | 1.2 | 2.3  | 1.3 | 2.5 |
| 2r07 | 0.6 | 0.9 | 0.6 | 1.3  | 0.6 | 0.8 |
| 2yhx | 0.8 | 2.9 | 1.8 | 6.2  | 0.7 | 0.8 |
| 2ypi | 1.0 | 1.5 | 3.0 | 10.3 | 0.9 | 1.5 |
| 3ert | 1.0 | 1.2 | 0.9 | 1.2  | 0.9 | 1.4 |
| 3gpb | 1.1 | 2.1 | 3.0 | 13.0 | 1.1 | 2.0 |
| 3hvt | 0.5 | 0.7 | 0.4 | 0.8  | 0.7 | 0.9 |
| 4aah | 0.5 | 0.8 | 4.0 | 5.6  | 0.5 | 3.8 |
| 4cox | 0.4 | 0.6 | 0.7 | 0.9  | 0.5 | 0.5 |
| 4cts | 2.1 | 3.7 | 3.9 | 8.2  | 1.5 | 1.6 |
| 4dfr | 2.9 | 8.4 | 3.5 | 5.3  | 2.4 | 3.5 |
| 4est | 2.1 | 2.9 | 2.3 | 2.9  | 2.3 | 3.5 |
| 4fbp | 0.3 | 0.5 | 5.7 | 10.8 | 0.3 | 0.4 |
| 4lbd | 1.0 | 1.0 | 1.0 | 1.1  | 1.0 | 1.0 |
| 4phv | 3.7 | 5.2 | 3.4 | 4.9  | 3.5 | 4.2 |
| 5abp | 0.5 | 0.5 | 2.1 | 11.5 | 0.4 | 0.5 |
| 5cpp | 1.9 | 1.9 | 1.9 | 5.4  | 1.9 | 1.9 |
| 6rnt | 1.5 | 2.1 | 6.7 | 10.8 | 1.0 | 1.1 |



|                 |     |     |     |      |     |     |
|-----------------|-----|-----|-----|------|-----|-----|
| 6rsa            | 0.4 | 0.8 | 2.6 | 10.1 | 0.4 | 0.9 |
| 7tim            | 1.1 | 1.7 | 3.6 | 4.0  | 0.8 | 1.7 |
| <b>Averages</b> | 1.3 | 2.4 | 2.8 | 5.2  | 1.3 | 1.9 |

**Table 2:**

Details of temperatures and molecular dynamics steps for each of the simulated annealing protocols.

| <b>Protocol</b>    |       | <b>Phase 1</b> | <b>Phase 2</b> | <b>Phase 3</b> | <b>Phase 4</b> |
|--------------------|-------|----------------|----------------|----------------|----------------|
| <i>SA- 1 Grid</i>  | Temps | 300 → 700      | 700            | 700 → 300      | 300 → 50       |
|                    | Steps | 2,250          | 10,500         | 5,250          | 2,250          |
| <i>SA- 2Grids*</i> | Temps | 300 → 700      | 700 → 300      | 500 → 300      | 400 → 300      |
|                    | Steps | 2,250          | 10,500         | 5,250          | 2,250          |

\*Wu, G. S.; Robertson, D. H.; Brooks, C. L. III; Vieth, M. J. *Comput. Chem.* **2003**, *24*, 1549.

**Table 3:**

Results for HIV Reverse Transcriptase cross-docking trial, totaling 173 unique protein-ligand complexes. The MD+Minimization protocol was the only one used in this trial as it was the most successful docking protocol in the redocking trials. Reported are the lowest RMSD structure sampled and the lowest energy RMSD conformation.

| <b>Receptor PDBID</b> | <b>Ligand PDBID</b> | <i>Rigid CDOCKER</i> |                      | <i>Flexible CDOCKER</i> |                      |
|-----------------------|---------------------|----------------------|----------------------|-------------------------|----------------------|
|                       |                     | <b>Lowest RMSD</b>   | <b>Lowest Energy</b> | <b>Lowest RMSD</b>      | <b>Lowest Energy</b> |
| 1clb                  | 1clc                | 0.9                  | 6.0                  | 1.0                     | 1.6                  |
| 1clb                  | 1ep4                | 1.7                  | 7.2                  | 1.5                     | 5.5                  |
| 1clb                  | 1rth                | 0.9                  | 6.2                  | 0.9                     | 6.2                  |
| 1clb                  | 1vru                | 1.1                  | 2.2                  | 0.9                     | 5.6                  |
| 1clb                  | 2be2                | 1.3                  | 1.8                  | 1.4                     | 1.5                  |
| 1clb                  | 2rf2                | 2.6                  | 3.4                  | 2.6                     | 2.9                  |
| 1clb                  | 2rki                | 1.9                  | 2.2                  | 1.9                     | 5.7                  |
| 1clb                  | 3dlg                | 1.2                  | 1.3                  | 2.4                     | 8.9                  |
| 1clb                  | 3dol                | 2.5                  | 10.8                 | 3.8                     | 10.6                 |
| 1clb                  | 3dya                | 2.9                  | 3.0                  | 2.9                     | 3.7                  |
| 1clc                  | 1clb                | 0.8                  | 2.0                  | 0.8                     | 2.1                  |
| 1clc                  | 1ep4                | 2.0                  | 7.0                  | 1.7                     | 6.1                  |
| 1clc                  | 1rt2                | 0.7                  | 0.7                  | 0.8                     | 1.6                  |
| 1clc                  | 1rth                | 1.2                  | 14.6                 | 1.1                     | 6.3                  |
| 1clc                  | 1vru                | 1.5                  | 5.2                  | 1.5                     | 5.5                  |

|      |      |     |      |     |      |
|------|------|-----|------|-----|------|
| 1c1c | 2be2 | 1.0 | 2.2  | 1.0 | 1.3  |
| 1c1c | 2rf2 | 2.2 | 6.3  | 2.1 | 6.1  |
| 1c1c | 2rki | 1.8 | 2.5  | 1.7 | 7.8  |
| 1ep4 | 1c1b | 0.9 | 1.3  | 1.4 | 2.8  |
| 1ep4 | 1rt2 | 1.3 | 2.0  | 1.4 | 5.1  |
| 1ep4 | 1rth | 1.2 | 12.4 | 1.7 | 4.6  |
| 1ep4 | 1vru | 1.6 | 5.1  | 2.1 | 4.9  |
| 1ep4 | 2be2 | 1.5 | 1.6  | 1.3 | 2.0  |
| 1ep4 | 2rf2 | 3.2 | 5.8  | 3.3 | 5.8  |
| 1ep4 | 2rki | 2.8 | 5.0  | 3.0 | 5.7  |
| likw | 1c1b | 4.1 | 5.7  | 4.3 | 7.2  |
| likw | 1c1c | 4.2 | 5.9  | 4.7 | 7.0  |
| likw | 1ep4 | 3.7 | 6.6  | 3.9 | 6.5  |
| likw | 1vru | 4.9 | 5.5  | 4.8 | 6.5  |
| likw | 2be2 | 7.1 | 10.4 | 6.7 | 10.8 |
| likw | 2rf2 | 4.4 | 7.3  | 4.4 | 6.7  |
| likw | 2rki | 5.2 | 8.8  | 5.2 | 8.8  |
| likw | 3dol | 7.9 | 10.0 | 7.9 | 10.6 |
| 1rt2 | 1ep4 | 2.2 | 13.6 | 2.1 | 2.8  |
| 1rt2 | 1rth | 1.5 | 14.9 | 4.2 | 14.7 |
| 1rt2 | 1vru | 1.8 | 14.9 | 1.6 | 5.1  |
| 1rt2 | 2be2 | 1.4 | 13.1 | 1.3 | 2.4  |
| 1rt2 | 2rf2 | 2.1 | 15.4 | 2.1 | 2.2  |
| 1rt2 | 2rki | 1.7 | 13.2 | 1.8 | 2.8  |
| 1rt2 | 3dlg | 1.0 | 12.8 | 0.8 | 1.6  |
| 1rth | 1c1b | 0.9 | 4.1  | 0.9 | 2.1  |
| 1rth | 1c1c | 1.3 | 5.4  | 1.2 | 1.7  |
| 1rth | 1rt2 | 2.4 | 7.8  | 2.8 | 7.3  |
| 1rth | 1vru | 1.3 | 4.6  | 0.8 | 5.3  |
| 1rth | 2be2 | 3.1 | 6.6  | 2.6 | 6.3  |
| 1rth | 2rki | 2.8 | 7.7  | 2.8 | 7.9  |
| 1slt | 1c1b | 0.8 | 1.2  | 1.1 | 1.5  |
| 1slt | 1c1c | 1.0 | 6.2  | 1.1 | 5.5  |
| 1slt | 1rt2 | 2.6 | 7.8  | 2.5 | 7.0  |
| 1slt | 1rth | 1.0 | 13.8 | 1.1 | 6.1  |
| 1slt | 1vru | 1.2 | 2.3  | 0.9 | 5.2  |
| 1slt | 2be2 | 2.3 | 6.3  | 2.2 | 6.8  |
| 1slt | 2rf2 | 1.7 | 1.9  | 1.4 | 4.7  |
| 1slt | 2rki | 1.7 | 7.6  | 2.4 | 7.4  |
| 1slt | 3dlg | 3.8 | 11.4 | 4.4 | 8.5  |
| 1vrt | 1c1b | 1.0 | 5.1  | 1.0 | 5.8  |
| 1vrt | 1c1c | 1.1 | 3.2  | 1.1 | 2.9  |
| 1vrt | 1rt2 | 2.7 | 7.3  | 3.0 | 7.3  |

|      |      |     |      |     |      |
|------|------|-----|------|-----|------|
| 1vrt | 1rth | 0.7 | 14.5 | 0.6 | 6.1  |
| 1vrt | 2be2 | 2.6 | 6.5  | 2.4 | 6.5  |
| 1vrt | 2rf2 | 1.2 | 4.5  | 1.5 | 4.5  |
| 1vrt | 2rki | 2.5 | 8.2  | 2.8 | 6.2  |
| 1vru | 1c1b | 1.0 | 5.0  | 1.0 | 1.9  |
| 1vru | 1c1c | 1.2 | 3.1  | 1.2 | 5.0  |
| 1vru | 1rt2 | 3.3 | 7.9  | 2.9 | 7.1  |
| 1vru | 1rth | 0.8 | 13.0 | 0.7 | 1.3  |
| 1vru | 2be2 | 3.2 | 6.3  | 2.9 | 6.5  |
| 1vru | 2rf2 | 1.5 | 4.5  | 1.4 | 5.8  |
| 2be2 | 1c1b | 1.3 | 1.4  | 1.2 | 5.0  |
| 2be2 | 1c1c | 1.2 | 1.2  | 1.2 | 1.4  |
| 2be2 | 1rt2 | 1.2 | 13.1 | 1.1 | 1.6  |
| 2be2 | 1rth | 1.9 | 13.4 | 2.3 | 5.9  |
| 2be2 | 2rf2 | 2.2 | 5.8  | 2.3 | 6.8  |
| 2hnd | 1c1b | 1.3 | 5.7  | 1.3 | 1.3  |
| 2hnd | 1c1c | 1.3 | 5.5  | 1.1 | 5.5  |
| 2hnd | 1rth | 1.3 | 13.9 | 0.8 | 1.7  |
| 2hnd | 2rf2 | 1.0 | 4.4  | 1.0 | 4.5  |
| 2hny | 1c1b | 1.3 | 5.8  | 1.2 | 5.5  |
| 2hny | 1c1c | 1.2 | 3.3  | 1.2 | 3.1  |
| 2hny | 1rth | 1.2 | 4.4  | 1.0 | 1.3  |
| 2hny | 2rf2 | 0.9 | 4.3  | 0.9 | 4.5  |
| 2hny | 3dlg | 4.6 | 9.5  | 4.8 | 7.8  |
| 2hny | 3dol | 6.9 | 11.4 | 6.5 | 11.2 |
| 2ops | 1c1c | 1.3 | 5.4  | 1.1 | 1.6  |
| 2ops | 1rt2 | 2.2 | 6.2  | 2.7 | 6.3  |
| 2ops | 1rth | 1.1 | 14.3 | 0.7 | 6.0  |
| 2ops | 2be2 | 2.7 | 6.5  | 3.1 | 6.8  |
| 2ops | 2rf2 | 1.6 | 4.6  | 1.5 | 4.5  |
| 2ops | 3dlg | 3.9 | 8.5  | 4.1 | 9.4  |
| 2rf2 | 1c1b | 1.5 | 13.9 | 1.3 | 5.4  |
| 2rf2 | 1c1c | 1.1 | 5.5  | 1.3 | 5.5  |
| 2rf2 | 1ep4 | 3.4 | 9.3  | 3.2 | 7.3  |
| 2rf2 | 1rt2 | 2.8 | 7.6  | 3.0 | 7.9  |
| 2rf2 | 1rth | 1.4 | 16.0 | 1.6 | 6.0  |
| 2rf2 | 1vru | 1.8 | 1.8  | 1.6 | 5.0  |
| 2rf2 | 2be2 | 3.8 | 13.7 | 3.5 | 7.2  |
| 2rf2 | 2rki | 2.7 | 14.9 | 2.6 | 4.2  |
| 2rf2 | 3dlg | 4.2 | 13.1 | 4.3 | 10.2 |
| 2rf2 | 3dol | 6.9 | 13.7 | 6.2 | 12.3 |
| 2rf2 | 3dya | 3.6 | 14.2 | 3.6 | 7.1  |
| 2rki | 1c1b | 1.6 | 12.2 | 1.6 | 2.5  |

|      |      |     |      |     |      |
|------|------|-----|------|-----|------|
| 2rki | 1c1c | 1.6 | 5.7  | 1.3 | 5.5  |
| 2rki | 1ep4 | 2.4 | 10.9 | 2.3 | 7.5  |
| 2rki | 1rt2 | 1.5 | 13.3 | 1.2 | 1.6  |
| 2rki | 1rth | 2.3 | 13.7 | 2.6 | 6.0  |
| 2rki | 1vru | 2.1 | 6.6  | 3.1 | 4.3  |
| 2rki | 2be2 | 1.7 | 12.2 | 2.0 | 2.1  |
| 2rki | 2rf2 | 1.5 | 12.8 | 1.2 | 4.7  |
| 2rki | 3dlg | 1.5 | 4.8  | 1.5 | 1.5  |
| 2rki | 3dol | 2.5 | 10.8 | 2.3 | 2.3  |
| 2rki | 3dya | 1.6 | 11.6 | 1.5 | 8.7  |
| 2zd1 | 1c1b | 1.5 | 2.7  | 1.5 | 1.6  |
| 2zd1 | 1c1c | 1.8 | 6.7  | 1.9 | 6.6  |
| 2zd1 | 1ep4 | 3.3 | 6.8  | 3.3 | 6.4  |
| 2zd1 | 1rt2 | 3.0 | 7.7  | 3.0 | 7.9  |
| 2zd1 | 1rth | 1.1 | 5.4  | 0.9 | 6.2  |
| 2zd1 | 1vru | 1.6 | 2.3  | 1.8 | 2.4  |
| 2zd1 | 2be2 | 3.1 | 7.6  | 2.4 | 6.0  |
| 2zd1 | 2rf2 | 2.5 | 5.0  | 2.4 | 5.1  |
| 2zd1 | 2rki | 3.0 | 8.2  | 3.0 | 8.1  |
| 2zd1 | 3dlg | 4.6 | 9.8  | 4.3 | 9.2  |
| 2zd1 | 3dol | 6.5 | 11.7 | 6.6 | 11.4 |
| 2zd1 | 3dya | 3.4 | 6.7  | 3.4 | 6.5  |
| 3bgr | 1c1b | 1.4 | 3.1  | 1.4 | 6.1  |
| 3bgr | 1c1c | 1.9 | 7.0  | 1.9 | 6.7  |
| 3bgr | 1ep4 | 2.8 | 8.7  | 2.8 | 6.2  |
| 3bgr | 1rt2 | 2.5 | 9.0  | 3.0 | 7.8  |
| 3bgr | 1rth | 1.1 | 6.1  | 1.0 | 1.5  |
| 3bgr | 1vru | 1.5 | 3.3  | 1.7 | 4.0  |
| 3bgr | 2be2 | 2.2 | 5.6  | 2.0 | 5.6  |
| 3bgr | 2rf2 | 3.0 | 5.2  | 2.9 | 5.1  |
| 3bgr | 2rki | 2.8 | 10.3 | 3.1 | 8.2  |
| 3bgr | 3dol | 6.5 | 13.0 | 6.2 | 9.4  |
| 3bgr | 3dya | 2.3 | 6.4  | 2.9 | 6.4  |
| 3dle | 1c1b | 1.2 | 14.3 | 1.3 | 6.0  |
| 3dle | 1c1c | 1.5 | 6.0  | 1.3 | 4.8  |
| 3dle | 1ep4 | 2.3 | 13.2 | 2.2 | 2.7  |
| 3dle | 1rt2 | 0.7 | 12.4 | 0.5 | 0.8  |
| 3dle | 1rth | 3.7 | 14.6 | 4.8 | 5.0  |
| 3dle | 1vru | 3.2 | 5.3  | 3.8 | 5.2  |
| 3dle | 2be2 | 1.4 | 1.7  | 1.3 | 2.5  |
| 3dle | 2rf2 | 2.3 | 5.0  | 2.7 | 7.4  |
| 3dle | 2rki | 2.4 | 15.4 | 2.0 | 2.8  |
| 3dle | 3dol | 1.1 | 4.4  | 1.7 | 2.2  |

|                 |      |     |      |     |      |
|-----------------|------|-----|------|-----|------|
| 3dle            | 3dya | 2.5 | 11.9 | 2.4 | 2.5  |
| 3dlg            | 1c1b | 1.3 | 13.9 | 1.7 | 5.2  |
| 3dlg            | 1c1c | 1.2 | 14.6 | 1.6 | 6.3  |
| 3dlg            | 1ep4 | 2.2 | 13.7 | 2.1 | 5.6  |
| 3dlg            | 1rt2 | 1.0 | 13.4 | 1.0 | 2.1  |
| 3dlg            | 1rth | 1.9 | 12.4 | 6.0 | 12.5 |
| 3dlg            | 1vru | 2.7 | 14.8 | 3.5 | 4.5  |
| 3dlg            | 2be2 | 1.2 | 1.5  | 1.0 | 1.5  |
| 3dlg            | 2rf2 | 2.3 | 5.0  | 3.7 | 5.6  |
| 3dlg            | 2rki | 2.2 | 11.9 | 2.2 | 6.8  |
| 3dlg            | 3dol | 1.4 | 2.4  | 1.7 | 2.5  |
| 3dlg            | 3dya | 2.5 | 3.6  | 2.3 | 2.5  |
| 3dol            | 1c1b | 4.7 | 13.5 | 2.6 | 2.6  |
| 3dol            | 1c1c | 4.4 | 5.5  | 4.8 | 5.7  |
| 3dol            | 1ep4 | 3.0 | 12.8 | 4.0 | 8.4  |
| 3dol            | 1rt2 | 1.9 | 11.8 | 2.2 | 2.6  |
| 3dol            | 1vru | 5.4 | 15.8 | 4.8 | 6.8  |
| 3dol            | 2be2 | 2.4 | 2.4  | 2.3 | 2.9  |
| 3dol            | 2rki | 3.4 | 13.3 | 3.2 | 4.3  |
| 3dol            | 3dlg | 1.6 | 2.7  | 1.4 | 1.4  |
| 3dol            | 3dya | 3.2 | 4.1  | 1.5 | 1.5  |
| 3dya            | 1c1b | 2.3 | 2.5  | 2.2 | 2.2  |
| 3dya            | 1c1c | 2.1 | 6.6  | 1.9 | 6.5  |
| 3dya            | 1ep4 | 2.1 | 3.0  | 2.0 | 2.8  |
| 3dya            | 1rt2 | 2.3 | 2.9  | 2.1 | 2.4  |
| 3dya            | 1rth | 3.0 | 13.6 | 3.2 | 6.7  |
| 3dya            | 1vru | 3.3 | 6.0  | 3.9 | 5.8  |
| 3dya            | 2be2 | 1.3 | 2.3  | 1.4 | 2.3  |
| 3dya            | 2rf2 | 1.9 | 2.7  | 1.9 | 6.4  |
| 3dya            | 2rki | 2.2 | 2.7  | 2.0 | 2.3  |
| <b>Averages</b> |      | 2.3 | 7.7  | 2.3 | 5.2  |

**Table 4:**

HIV Reverse transcriptase cross-docking results with comparison to results as published by Rizzo et al.

|                              |                  | <b>%Found</b> | <b>%Scored</b> |
|------------------------------|------------------|---------------|----------------|
| <b>131 Unique Complexes</b>  | Flexible CDOCKER | 47.3          | 19.1           |
|                              | Rigid CDOCKER    | 48.1          | 10.7           |
| <b>61 Overlap Complexes</b>  | Flexible CDOCKER | 63.9          | 24.6           |
|                              | Rigid CDOCKER    | 65.6          | 14.8           |
|                              | DOCK 6*          | -             | 66.7           |
| <b>70 Complexes</b>          | Flexible CDOCKER | 32.9          | 14.3           |
| <b>"Non-viable Pairings"</b> | Rigid CDOCKER    | 32.9          | 7.1            |

\* Allen, W. J.; Balius, T. E.; Mukherjee, S.; Brozell, S. R.; Moustakas, D. T.; Lang, P. T.; Case, D. A.; Kuntz, I. D.; Rizzo, R. C. *J. Comput. Chem.* 2015, 36, 1132.

**Figure 1:**

The time taken by Flexible CDOCKER to generate 50 conformations for a single docking trial as distributed over the CCDC/Astex clean-set. All complexes took under 10 minutes for Rigid CDOCKER.

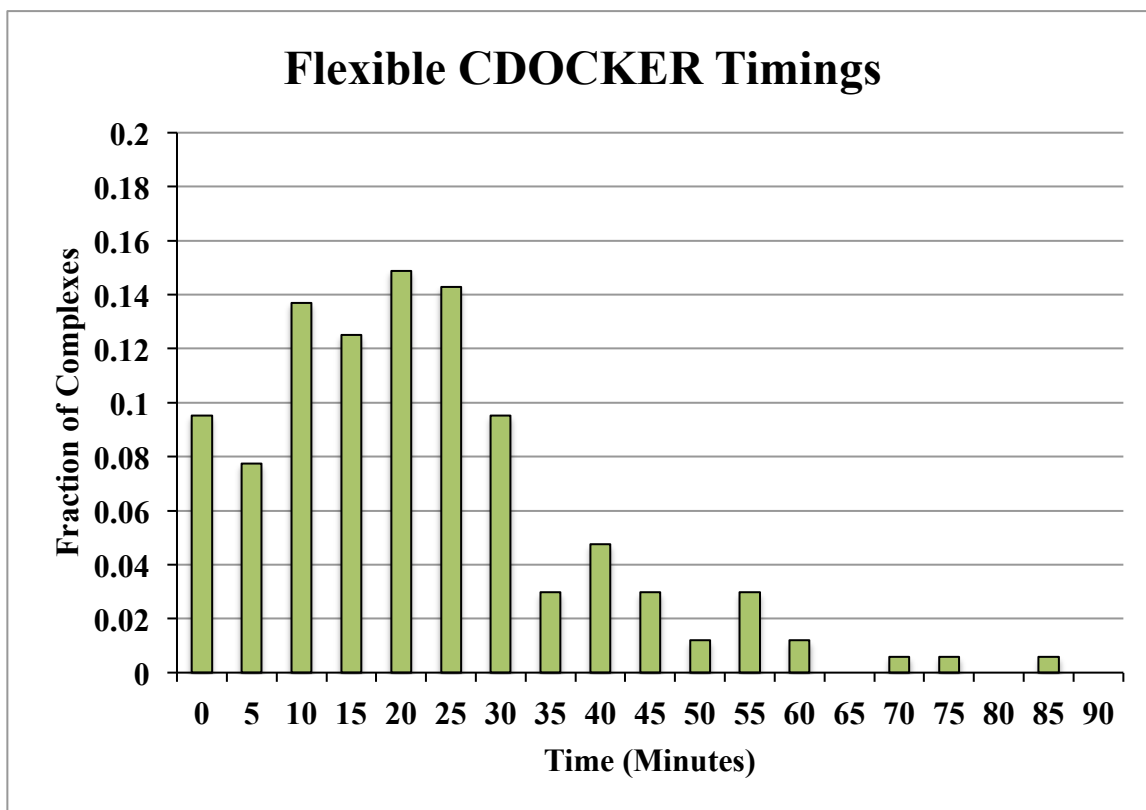

**Figure 2:**

The time taken for a single docking trial scales linearly with the number of explicit atoms included in the flexible receptor docking.

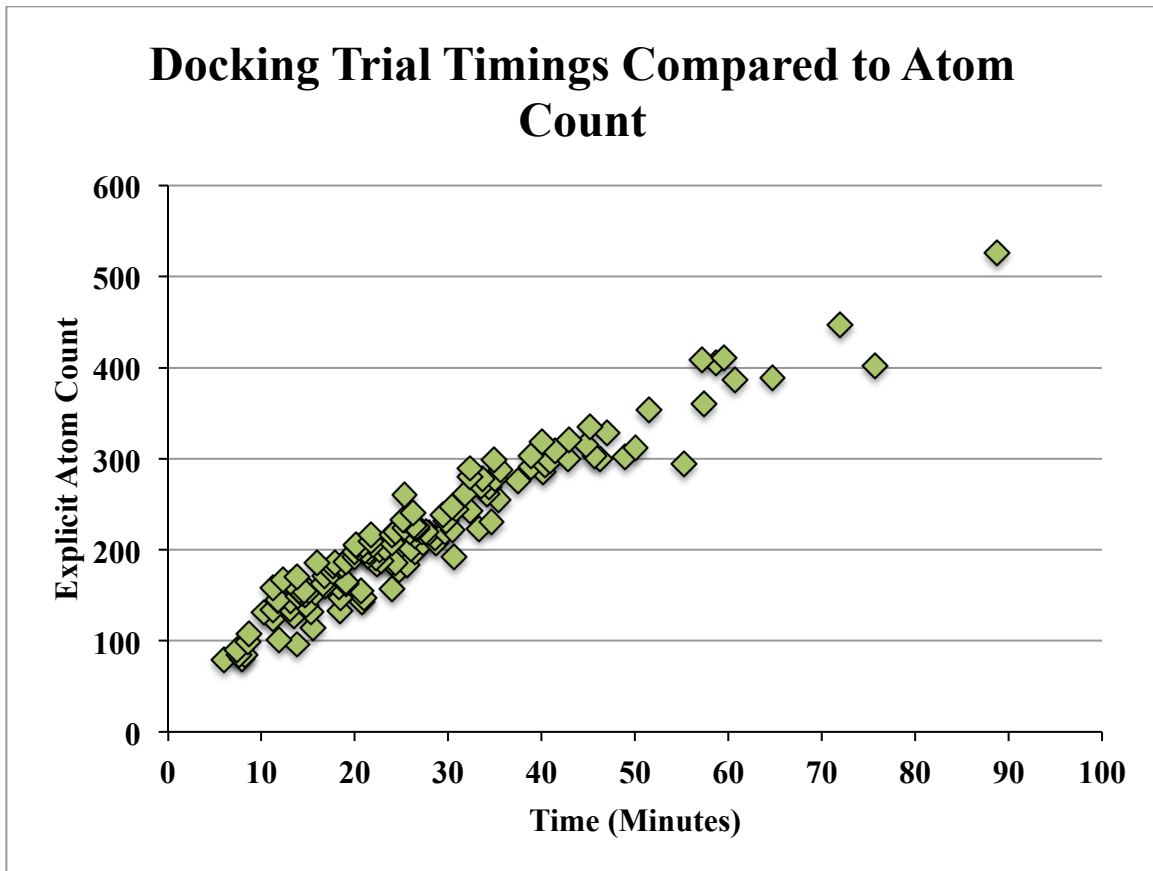



**Figure 3:**

(Supporting information Figure 1 in section “Flexible CDOCKER improves cross-docking accuracy: A case study”)

Overlay of the predicted lowest free energy conformation found with Flexible CDOCKER and crystallographic structures of Alpha MMC. The ligand conformation (gray) has an RMSD of 1.42Å from the crystallographic conformation. The tyrosine residue on the protein from the apo structure (green) clashed with ligand causing a dihedral angle shift of this residue in the holo structure (blue). The tyrosine from the predicted conformation (magenta) remains near the apo dihedral angle, suggesting that this small shift is sufficient to achieve a low energy docked conformation.

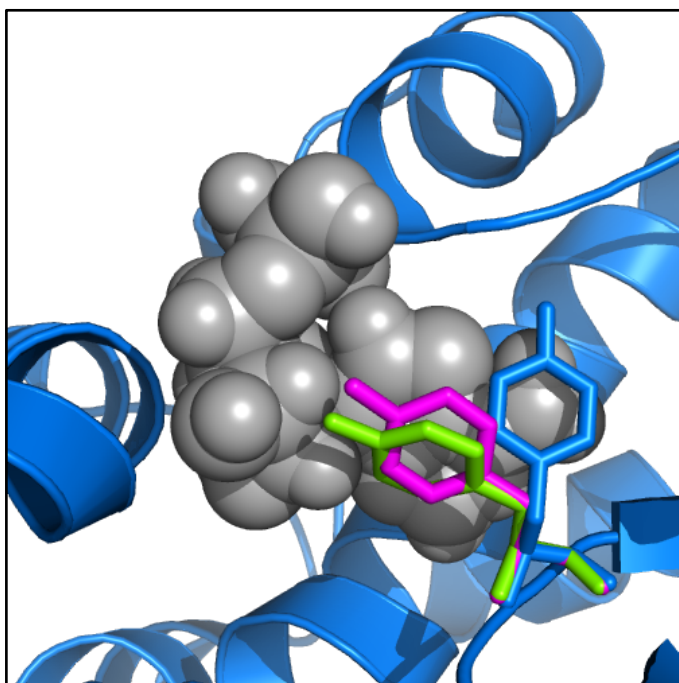

Supplement: NIHMS757924-supplement-Supp_Info.pdf [file NIHMS757924-supplement-Supp_Info.pdf]
